# Supplementary material for: Estimating the thickness of unconsolidated coastal aquifers along the global coastline
Source: Copernicus journal article supplement (doi:10.5194/essd-2017-110), 2018-02-05
Supplement: Supplementary file 1 [file essd-2017-110-supplement.pdf]

## Supplement of

# Estimating the thickness of unconsolidated coastal aquifers along the global coastline

Daniel Zamrsky<sup>1</sup>, Gualbert H.P. Oude Essink<sup>1,2</sup>, and Marc F.P. Bierkens<sup>1,2</sup>

<sup>1</sup>Department of Physical geography, Utrecht University, Utrecht, The Netherlands

<sup>2</sup>Deltares, Utrecht, The Netherlands

Correspondence to: Daniel Zamrsky (d.zamrsky@uu.nl)

**Table S1. Borehole validation dataset sources**

| Dataset Name | Source                                                                                                                                                                                                                                      |
|--------------|---------------------------------------------------------------------------------------------------------------------------------------------------------------------------------------------------------------------------------------------|
| CPRM         | Geological survey of Brazil, c2016, published by Companhia de Pesquisa de Recursos Minerais [Accessed 2016, August], <a href="http://www.cprm.gov.br/">http://www.cprm.gov.br/</a>                                                          |
| GeoVIC       | Online geology portal of Victoria, Australia, c2016, published by the state of Victoria [Accessed 2016, October], <a href="http://er-info.dpi.vic.gov.au/sd_weave/anonymous.html">http://er-info.dpi.vic.gov.au/sd_weave/anonymous.html</a> |
| CGS          | China Geological Survey, 2012. Groundwater serial maps of Asia: Hydrogeological map, Groundwater resources map, Geothermal map, Sinomaps Press.                                                                                             |

**Table S2. Literature validation dataset sources**

| Polygon ID | Source                                                                                                                                                                                                                                                                                    |
|------------|-------------------------------------------------------------------------------------------------------------------------------------------------------------------------------------------------------------------------------------------------------------------------------------------|
| 1          | Lagudu, S. et al., 2013. Use of Geophysical and Hydrochemical Tools to Investigate Seawater Intrusion in Coastal Alluvial Aquifer, Andhra Pradesh, India. In C. Wetzelhuetter, ed. Groundwater in the Coastal Zones of Asia-Pacific. Dordrecht: Springer Netherlands, pp. 49–65.          |
| 2          | Singh, S.C., 2013. Geophysical Viewpoints for Groundwater Resource Development and Management in Coastal Tracts. In C. Wetzelhuetter, ed. Groundwater in the Coastal Zones of Asia-Pacific. Dordrecht: Springer Netherlands, pp. 67–87.                                                   |
| 3          | Duerrast, H. & Srattakal, J., 2013. Geophysical Investigations of Saltwater Intrusion into the Coastal Groundwater Aquifers of Songkhla City, Southern Thailand. In C. Wetzelhuetter, ed. Groundwater in the Coastal Zones of Asia-Pacific. Dordrecht: Springer Netherlands, pp. 155–175. |
| 4          | Sherif, M., Almulla, M. & Shetty, A., 2013. Seawater Intrusion Assessment and Mitigation in the Coastal Aquifer of Wadi Ham. In C. Wetzelhuetter, ed. Groundwater in the Coastal Zones of Asia-Pacific. Dordrecht: Springer Netherlands, pp. 271–294.                                     |
| 5          | Leonhard, L., Burton, K. & Milligan, N., 2013. Gascoyne River, Western Australia; Alluvial Aquifer, Groundwater Management and Tools. In C. Wetzelhuetter, ed. Groundwater in the Coastal Zones of Asia-Pacific. Dordrecht: Springer Netherlands, pp. 359–378.                            |
| 6          | Wagner, F., Tran, V.B. & Renaud, F.G., 2012. Groundwater Resources in the Mekong Delta: Availability, Utilization and Risks. In F. G. Renaud & C. Kuenzer, eds. The Mekong Delta System: Interdisciplinary Analyses of a River Delta. Dordrecht: Springer Netherlands, pp. 201–220.       |
| 7          | Benkabbour, B., Toto, E.A. & Fakir, Y., 2004. Using DC resistivity method to characterize the geometry and the salinity of the Plioquaternary consolidated coastal                                                                                                                        |

|    |                                                                                                                                                                                                                                                                                                                                                                                                                                   |
|----|-----------------------------------------------------------------------------------------------------------------------------------------------------------------------------------------------------------------------------------------------------------------------------------------------------------------------------------------------------------------------------------------------------------------------------------|
|    | aquifer of the Mamora plain, Morocco. <i>Environmental Geology</i> , 45(4), pp.518–526. Available at: <a href="http://link.springer.com/10.1007/s00254-003-0906-y">http://link.springer.com/10.1007/s00254-003-0906-y</a> .<br>Amharref, M. et al., 2007. Cartographie de la vulnérabilité à la pollution des eaux souterraines: Application à la plaine du Gharb ( Maroc ). <i>Journal of Water Science</i> , 20(2), pp.185–199. |
| 8  | Chen, J. et al., 2014. Clay minerals in the Pliocene - Quaternary sediments of the southern Yangtze coast, China: Sediment sources and palaeoclimate implications. <i>Journal of Palaeogeography</i> , 3(3), pp.297–308. Available at: <a href="http://dx.doi.org/10.3724/SP.J.1261.2014.00057">http://dx.doi.org/10.3724/SP.J.1261.2014.00057</a> .                                                                              |
| 9  | Cobaner, M. et al., 2012. Three-dimensional simulation of seawater intrusion in coastal aquifers: A case study in the Goksu Deltaic Plain. <i>Journal of Hydrology</i> , 464-465, pp.262–280. Available at: <a href="http://dx.doi.org/10.1016/j.jhydrol.2012.07.022">http://dx.doi.org/10.1016/j.jhydrol.2012.07.022</a> .                                                                                                       |
| 10 | Carretero, S. et al., 2013. Impact of sea-level rise on saltwater intrusion length into the coastal aquifer, Partido de La Costa, Argentina. <i>Continental Shelf Research</i> , 61-62, pp.62–70. Available at: <a href="http://dx.doi.org/10.1016/j.csr.2013.04.029">http://dx.doi.org/10.1016/j.csr.2013.04.029</a> .                                                                                                           |
| 11 | Rasmussen, P. et al., 2013. Assessing impacts of climate change, sea level rise, and drainage canals on saltwater intrusion to coastal aquifer. <i>Hydrology and Earth System Sciences</i> , 17(1), pp.421–443. Available at: <a href="http://www.hydrol-earth-syst-sci.net/17/421/2013/">http://www.hydrol-earth-syst-sci.net/17/421/2013/</a> .                                                                                 |
| 12 | Kalm, V. & Gorlach, A., 2014. Impact of bedrock surface topography on spatial distribution of Quaternary sediments and on the flow pattern of late Weichselian glaciers on the East European Craton (Russian Plain). <i>Geomorphology</i> , 207, pp.1–9. Available at: <a href="http://dx.doi.org/10.1016/j.geomorph.2013.10.022">http://dx.doi.org/10.1016/j.geomorph.2013.10.022</a> .                                          |
| 13 | Chen, J. et al., 2014. Clay minerals in the Pliocene - Quaternary sediments of the southern Yangtze coast, China: Sediment sources and palaeoclimate implications. <i>Journal of Palaeogeography</i> , 3(3), pp.297–308. Available at: <a href="http://dx.doi.org/10.3724/SP.J.1261.2014.00057">http://dx.doi.org/10.3724/SP.J.1261.2014.00057</a> .                                                                              |
| 14 | Sefelnasr, A. & Sherif, M., 2014. Impacts of Seawater Rise on Seawater Intrusion in the Nile Delta Aquifer, Egypt., 52(2), pp.264–276.                                                                                                                                                                                                                                                                                            |
| 15 | Singaraja, C. et al., 2015. A study on the status of saltwater intrusion in the coastal hard rock aquifer of South India. <i>Environment, Development and Sustainability</i> , 17(3), pp.443–475. Available at: <a href="http://dx.doi.org/10.1007/s10668-014-9554-5">http://dx.doi.org/10.1007/s10668-014-9554-5</a> .                                                                                                           |
| 16 | Khaki, M. et al., 2016. Integrated geoelectrical and hydrogeochemical investigation for mapping the aquifer at Langat Basin, Malaysia. <i>Environmental Earth Sciences</i> , 75(4), pp.1–14. Available at: " <a href="http://dx.doi.org/10.1007/s12665-015-5182-0">http://dx.doi.org/10.1007/s12665-015-5182-0</a> .                                                                                                              |
| 17 | Giresse, P. et al., 2000. Successions of sea-level changes during the Pleistocene in Mauritania and Senegal distinguished by sedimentary facies study and U / Th dating., 170.<br>Sylla, M., Medou, J.O. & Samb, E., 1997. Contribution of the instantaneous well logging to the study of the indurations. <i>Bulletin of the International Association of Engineering Geology</i> , (55).                                        |
| 18 | Nicholas, C.J. et al., 2006. Stratigraphy and sedimentology of the Upper Cretaceous to Paleogene Kilwa Group, southern coastal Tanzania. , 45, pp.431–466.                                                                                                                                                                                                                                                                        |
| 19 | Y. Yecheili, O. Sivan (2010), Using geochemical tools to study the distribution of saline groundwater in aquifers separated by aquitards: examples from Israel, paper presented at the 21th Salt Water Intrusion Meeting, Azores, Portugal                                                                                                                                                                                        |
| 20 | Dirks et al. (1988), Groundwater in Bekasi district, West Java, Indonesia, paper presented at the 10th Salt Water Intrusion Meeting, Gent, Belgium                                                                                                                                                                                                                                                                                |
| 21 | McPherson, A. & Jones, A., 2005. Appendix D: Perth Basin geology review and site class assessment. <i>Natural Hazard Risk in Perth</i> , pp.313–344. Available at: <a href="https://www.icsm.gov.au/image_cache/GA6548.pdf">https://www.icsm.gov.au/image_cache/GA6548.pdf</a> .                                                                                                                                                  |
| 22 | Ransley, T.R., Radke, B.M., Feitz, A.J., Kellett, J.R., Owens, R., Bell, J., Stewart, G. and Carey, H. 2015. <i>Hydrogeological Atlas of the Great Artesian Basin</i> , Geoscience Australia, Canberra.                                                                                                                                                                                                                           |

|           |                                                                                                                                                                                                                                                                                                                                                                                                                                                                                                                                                                                                                                                                                                                                           |
|-----------|-------------------------------------------------------------------------------------------------------------------------------------------------------------------------------------------------------------------------------------------------------------------------------------------------------------------------------------------------------------------------------------------------------------------------------------------------------------------------------------------------------------------------------------------------------------------------------------------------------------------------------------------------------------------------------------------------------------------------------------------|
|           | <a href="http://dx.doi.org/10.11636/9781925124668">http://dx.doi.org/10.11636/9781925124668</a>                                                                                                                                                                                                                                                                                                                                                                                                                                                                                                                                                                                                                                           |
| <b>23</b> | Yeates, A.N. et al., 1984. Regional geology of the onshore Canning Basin, Western Australia. The Canning Basin, Western Australia, pp.23–56.                                                                                                                                                                                                                                                                                                                                                                                                                                                                                                                                                                                              |
| <b>24</b> | E. Custodio (1992), Preliminary outlook of saltwater intrusion conditions in the Donana National Park (southern Spain), paper presented at 12th Salt Water Intrusion Meeting, Barcelona, Spain<br>J.L. Plata and F.M. Rubio (2004), Study of the salt water - fresh water interface in environments of low resistivity: Donana aquifer (Spain), paper presented at the 18th Salt Water Intrusion Meeting, Cartagena, Spain                                                                                                                                                                                                                                                                                                                |
| <b>25</b> | Custodio, E., V. Iribar, M. Manzano, A. Bayó and A. Galofré (1986), Evolution of sea water intrusion in the Llobregat Delta, Barcelona, Spain, paper presented at the 9th Salt Water Intrusion Meeting, Delft, The Netherlands<br><br>E. Falgas, J. Ledo, T. Teixido, A. Gabas, F. Ribera, C. Arango, P. Queralt, J.L. Plata, F.M. Rubio, J.A. Pena, A. Marti, A. Marcuello (2004), Geophysical characterization of a mediterranean coastal aquifer: The Baixa Tordera fluvio-deltaic aquifer unit (Barcelona, NE Spain), paper presented at the 18th Salt Water Intrusion Meeting, Cartagena, Spain                                                                                                                                      |
| <b>26</b> | B. Aunay, C. Duvail, P. Le Strat, N. Dorfliger, P. Lachassagne and S. Pistre (2004), Importance of a high resolution lithological and geometrical knowledge for Mediterranean coastal sedimentary aquifers management. Application to the Roussillon basin, South of France, paper presented at the 18th Salt Water Intrusion Meeting, Cartagena, Spain                                                                                                                                                                                                                                                                                                                                                                                   |
| <b>27</b> | P. Cau, G. Lecca, L. Muscas, G. Barrocu and G. Uras (2002), Seawater intrusion in the plain of Oristano (Sardinia, Italy), paper presented at the 17th Salt Water Intrusion Meeting, Delft, The Netherlands                                                                                                                                                                                                                                                                                                                                                                                                                                                                                                                               |
| <b>28</b> | F. Ardaù, R. Balia, G. Barbieri, G. Barrocu, E. Gavaudo and G. Ghiglieri (2002), Recent development in hydrogeological and geophysical research in the Muravera coastal plain (SE Sardinia, Italy), paper presented at the 17th Salt Water Intrusion Meeting, Delft, The Netherlands                                                                                                                                                                                                                                                                                                                                                                                                                                                      |
| <b>29</b> | V. Ferrara and A. Pennisi (2004), Salt water intrusion and its influence on groundwater use in the Siracusa area (south-eastern Sicily), paper presented at the 13th Salt Water Intrusion Meeting, Cagliari, Italy                                                                                                                                                                                                                                                                                                                                                                                                                                                                                                                        |
| <b>30</b> | A. Bencini & G. Pranzini (1992), The salinization of groundwaters in the Grosseto Plain (Tuscany, Italy), paper presented at the 12th Salt Water Intrusion Meeting, Barcelona, Spain                                                                                                                                                                                                                                                                                                                                                                                                                                                                                                                                                      |
| <b>31</b> | G. Pranzini (2002), Groundwater salinization in Versilia (Italy), paper presented at the 17 <sup>th</sup> Salt Water Intrusion Meeting, Delft, The Netherlands                                                                                                                                                                                                                                                                                                                                                                                                                                                                                                                                                                            |
| <b>32</b> | E. Van Houtte, L. Lebbe, L. Zeuwts and F. Vanlerberghé (2002), Concept for development of sustainable drinking-water production in the Flemish coastal plain based on integrated water management, paper presented at the 17 <sup>th</sup> Salt Water Intrusion Meeting, Delft, The Netherlands<br>Lebbe, L.C. and K. Pede (1986), Salt-fresh water flow underneath old dunes and low polders influenced by pumpage and drainage in the Western Belgian coastal plain, paper presented at 9th Salt Water Intrusion Meeting, Delft, The Netherlands<br>Lebbe, L. and K. Walraevens (1988), Hydrogeological SWIM-excursion to the western coastal plain of Belgium, paper presented at the 10th Salt Water Intrusion Meeting, Gent, Belgium |
| <b>33</b> | Lotringen, I.G.J. van, and R. H. Boekelman (1986), Behaviour of circular fresh water lenses, paper presented at the 9th Salt Water Intrusion Meeting, Delft, The Netherlands<br>Meerten, J.J. van, and R.H. Boekelman (1986), Well-infiltration in fresh-water pockets in sandy ridges in Zeeland, paper presented at the 9th Salt Water Intrusion Meeting, Delft, The Netherlands<br>Walraevens et al. (1988), Hydrogeological SWIM-excursion to the Black-Sluice Polder                                                                                                                                                                                                                                                                 |

|                   |                                                                                                                                                                                                                                                                                                                                                                                                                                                                                                                                                                                                                                                                                                                                                                                                                                                                                                                                                                                                                                                                                                                                                                                                                                                                                                                                                                                                                                                                                                                                                                                                                                                                                                                                                                                                                                                                                                                                                                                                                                                                                                                                                                                                                                    |
|-------------------|------------------------------------------------------------------------------------------------------------------------------------------------------------------------------------------------------------------------------------------------------------------------------------------------------------------------------------------------------------------------------------------------------------------------------------------------------------------------------------------------------------------------------------------------------------------------------------------------------------------------------------------------------------------------------------------------------------------------------------------------------------------------------------------------------------------------------------------------------------------------------------------------------------------------------------------------------------------------------------------------------------------------------------------------------------------------------------------------------------------------------------------------------------------------------------------------------------------------------------------------------------------------------------------------------------------------------------------------------------------------------------------------------------------------------------------------------------------------------------------------------------------------------------------------------------------------------------------------------------------------------------------------------------------------------------------------------------------------------------------------------------------------------------------------------------------------------------------------------------------------------------------------------------------------------------------------------------------------------------------------------------------------------------------------------------------------------------------------------------------------------------------------------------------------------------------------------------------------------------|
|                   | area in the Flemish Valley of Belgium, paper presented at the 10th Salt Water Intrusion Meeting, Gent, Belgium                                                                                                                                                                                                                                                                                                                                                                                                                                                                                                                                                                                                                                                                                                                                                                                                                                                                                                                                                                                                                                                                                                                                                                                                                                                                                                                                                                                                                                                                                                                                                                                                                                                                                                                                                                                                                                                                                                                                                                                                                                                                                                                     |
| <b>34</b>         | <p>Delsman, J.R. et al., 2013. Palaeo-modeling of coastal salt water intrusion during the Holocene: an application to the Netherlands. <i>Hydrology and Earth System Sciences Discussions</i>, 10(11), pp.13707–13742. Available at: <a href="http://www.hydrol-earth-syst-sci-discuss.net/10/13707/2013/hessd-10-13707-2013.html">http://www.hydrol-earth-syst-sci-discuss.net/10/13707/2013/hessd-10-13707-2013.html</a>.</p> <p>G.H.P. Oude Essink (2002), Salinization of the Wieringermeerpolder, The Netherlands, paper presented at the 17<sup>th</sup> Salt Water Intrusion Meeting, Delft, The Netherlands</p> <p>P.J. Stuyfzand (1992), Behaviour of major and trace constituents in fresh and salt intrusion waters, in the western Netherlands, paper presented at the 12th Salt Water Intrusion Meeting, Barcelona, Spain</p> <p>Stuyfzand, P.J. (1988), Hydrochemical evidence of fresh- and salt-water intrusions in the coastal dunes aquifer system of the western Netherlands, paper presented at the 10th Salt Water Intrusion Meeting, Gent, Belgium</p> <p>Pomper, A.B. (1972), Evidence of the influence of man on the natural processes related with salinization of groundwater in the western part of West-Netherlands, paper presented at the 3rd Salt Water Intrusion Meeting, Copenhagen, Denmark</p> <p>Roebert, A.J. (1972), Salt water contamination of the wells along the Barnaart-Schuster Canal in the Amsterdam Dune Water Catchment Area, paper presented at the 3rd Salt Water Intrusion Meeting, Copenhagen, Denmark</p> <p>Roebert, A.J. (1972), Salt water contamination of the wells along the Barnaart-Schuster Canal in the Amsterdam Dune Water Catchment Area, paper presented at the 3rd Salt Water Intrusion Meeting, Copenhagen, Denmark</p> <p>Pomper, A.B. (1977), An estimation of chloride intrusion in the midwest Netherlands during the Pleistocene epoch, paper presented at the 5th Salt Water Intrusion Meeting, Medmenham, United Kingdom</p> <p>De Vries, J.J. (1981), The distribution of fresh and salt groundwater in the Dutch coastal area and the Quaternary-geological evolution, paper presented at the 7th Salt Water Intrusion Meeting, Uppsala, Sweden</p> |
| <b>35</b>         | A. Rogge & V. Josopait (1992), Salinization caused by groundwater abstraction from an aquifer on the German North Sea coast, paper presented at the 12th Salt Water Intrusion Meeting, Barcelona, Spain                                                                                                                                                                                                                                                                                                                                                                                                                                                                                                                                                                                                                                                                                                                                                                                                                                                                                                                                                                                                                                                                                                                                                                                                                                                                                                                                                                                                                                                                                                                                                                                                                                                                                                                                                                                                                                                                                                                                                                                                                            |
| <b>36</b>         | M.D. Fidelibus, E. Gimenez, I. Morell & L. Tulipano (1992), Salinization processes in the Castellon plain aquifer (Spain), paper presented at the 12th Salt Water Intrusion Meeting, Barcelona, Spain                                                                                                                                                                                                                                                                                                                                                                                                                                                                                                                                                                                                                                                                                                                                                                                                                                                                                                                                                                                                                                                                                                                                                                                                                                                                                                                                                                                                                                                                                                                                                                                                                                                                                                                                                                                                                                                                                                                                                                                                                              |
| <b>37</b>         | A. Bayo, C. Loaso, J.M. Aragones & E. Custodio (1992), Marine intrusion and brackish water in coastal aquifers of Southern Catalonia and Castello (Spain): a brief survey of actual problems and circumstances, paper presented at the 12th Salt Water Intrusion Meeting, Barcelona, Spain                                                                                                                                                                                                                                                                                                                                                                                                                                                                                                                                                                                                                                                                                                                                                                                                                                                                                                                                                                                                                                                                                                                                                                                                                                                                                                                                                                                                                                                                                                                                                                                                                                                                                                                                                                                                                                                                                                                                         |
| <b>38</b>         | M. Fidelibus, F. Caporale and G. Spilotro (2004), Studies on different kinds of salinisation in the ground waters of the Ionian coastal plain of the Basilicata region, paper presented at the 18th Salt Water Intrusion Meeting, Cartagena, Spain                                                                                                                                                                                                                                                                                                                                                                                                                                                                                                                                                                                                                                                                                                                                                                                                                                                                                                                                                                                                                                                                                                                                                                                                                                                                                                                                                                                                                                                                                                                                                                                                                                                                                                                                                                                                                                                                                                                                                                                 |
| <b>39</b>         | (Planert & Williams 1995)                                                                                                                                                                                                                                                                                                                                                                                                                                                                                                                                                                                                                                                                                                                                                                                                                                                                                                                                                                                                                                                                                                                                                                                                                                                                                                                                                                                                                                                                                                                                                                                                                                                                                                                                                                                                                                                                                                                                                                                                                                                                                                                                                                                                          |
| <b>40, 41</b>     | Olcott, P.G., 1995. <i>Ground Water Atlas of the United States: Segment 12, Connecticut, Maine, Massachusetts, New Hampshire, New York, Rhode Island, Vermont</i> - ed., Available at: <a href="http://pubs.er.usgs.gov/publication/ha730M">http://pubs.er.usgs.gov/publication/ha730M</a> .                                                                                                                                                                                                                                                                                                                                                                                                                                                                                                                                                                                                                                                                                                                                                                                                                                                                                                                                                                                                                                                                                                                                                                                                                                                                                                                                                                                                                                                                                                                                                                                                                                                                                                                                                                                                                                                                                                                                       |
| <b>42, 43, 44</b> | Trapp Jr., H. & Horn, M.A., 1997. <i>Ground Water Atlas of the United States: Segment 11, Delaware, Maryland, New Jersey, North Carolina, Pennsylvania, Virginia, West Virginia</i> - ed.,                                                                                                                                                                                                                                                                                                                                                                                                                                                                                                                                                                                                                                                                                                                                                                                                                                                                                                                                                                                                                                                                                                                                                                                                                                                                                                                                                                                                                                                                                                                                                                                                                                                                                                                                                                                                                                                                                                                                                                                                                                         |
| <b>45</b>         | Ryder, P.D., 1996. <i>Ground Water Atlas of the United States: Segment 4, Oklahoma, Texas</i> - ed., Available at: <a href="http://pubs.er.usgs.gov/publication/ha730E">http://pubs.er.usgs.gov/publication/ha730E</a> .                                                                                                                                                                                                                                                                                                                                                                                                                                                                                                                                                                                                                                                                                                                                                                                                                                                                                                                                                                                                                                                                                                                                                                                                                                                                                                                                                                                                                                                                                                                                                                                                                                                                                                                                                                                                                                                                                                                                                                                                           |
| <b>46, 47, 48</b> | Renken, R.A., 1998. <i>Ground Water Atlas of the United States: Segment 5, Arkansas, Louisiana, Mississippi</i> - ed.,                                                                                                                                                                                                                                                                                                                                                                                                                                                                                                                                                                                                                                                                                                                                                                                                                                                                                                                                                                                                                                                                                                                                                                                                                                                                                                                                                                                                                                                                                                                                                                                                                                                                                                                                                                                                                                                                                                                                                                                                                                                                                                             |
| <b>49, 50, 51</b> | Whitehead, R.L., 1994. <i>Ground Water Atlas of the United States: Segment 7, Idaho</i> ,                                                                                                                                                                                                                                                                                                                                                                                                                                                                                                                                                                                                                                                                                                                                                                                                                                                                                                                                                                                                                                                                                                                                                                                                                                                                                                                                                                                                                                                                                                                                                                                                                                                                                                                                                                                                                                                                                                                                                                                                                                                                                                                                          |

|                           |                                                                                                                                                                                                                                                                                                                                                                                     |
|---------------------------|-------------------------------------------------------------------------------------------------------------------------------------------------------------------------------------------------------------------------------------------------------------------------------------------------------------------------------------------------------------------------------------|
|                           | Oregon, Washington - ed.,                                                                                                                                                                                                                                                                                                                                                           |
| <b>52, 53, 54</b>         | Planert, M. & Williams, J.S., 1995. Ground Water Atlas of the United States: Segment 1, California, Nevada - ed.,                                                                                                                                                                                                                                                                   |
| <b>55, 56, 57, 58, 59</b> | Miller, J.A., 1990. Ground Water Atlas of the United States: Segment 6, Alabama, Florida, Georgia, South Carolina - ed., Available at: <a href="http://pubs.er.usgs.gov/publication/ha730G">http://pubs.er.usgs.gov/publication/ha730G</a> .                                                                                                                                        |
| <b>60</b>                 | Tuttle, M.L.W., Charpentier, R. & Brownfield, M.E., 1999. The Niger Delta Petroleum System: Niger Delta Province, Nigeria, Cameroon, and Equatorial Guinea, Africa. World Energy Project, (99-50-H), p.64.                                                                                                                                                                          |
| <b>61</b>                 | M. Gennessaux, P.B. and E.W., 1998. Thickness of the Plio-Quaternary sediments (IBCM-PQ). <i>BOLLETTINO DI GEOFISICA TEORICA ED APPLICATA</i> , 39(4), pp.243–284.                                                                                                                                                                                                                  |
| <b>62</b>                 | Al Farrah, N., Van Camp, M. & Walraevens, K., 2013. Deducing transmissivity from specific capacity in the heterogeneous upper aquifer system of Jifarah Plain, NW-Libya. <i>Journal of African Earth Sciences</i> , 85, pp.12–21. Available at: <a href="http://dx.doi.org/10.1016/j.jafrearsci.2013.04.004">http://dx.doi.org/10.1016/j.jafrearsci.2013.04.004</a> .               |
| <b>63</b>                 | Van Camp, M. et al., 2014. Investigating seawater intrusion due to groundwater pumping with schematic model simulations: The example of the Dar es Salaam coastal aquifer in Tanzania. <i>Journal of African Earth Sciences</i> , 96, pp.71–78. Available at: <a href="http://dx.doi.org/10.1016/j.jafrearsci.2014.02.012">http://dx.doi.org/10.1016/j.jafrearsci.2014.02.012</a> . |
| <b>64</b>                 | Kumar, B. et al., 2011. Groundwater management in a coastal aquifer in Krishna River Delta, South India using isotopic approach. , 100(7).                                                                                                                                                                                                                                          |

**Table S3. Aquifer thickness information provided by the literature sources compared with the ATE values for each coastal area (column “id”, corresponds to ID values in Figure S6). For each are the location is also given. The values from literature are shown in columns below the “Measured values” header while our ATE values are below the “ATE values” header. The “calc\_avg” column represents the calculated average value in cases where only min., max. or both were given by the literature. The “calc\_avg” is calculated as either the arithmetic average between the min. and max. values or as min./max. value +/- half of min./max.**

| id | Measured values (m) |           |           | calc_avg | ATE values (m) |         |         | location                                          |
|----|---------------------|-----------|-----------|----------|----------------|---------|---------|---------------------------------------------------|
|    | thick_max           | thick_min | thick_avg |          | est_avg        | est_min | est_max |                                                   |
| 1  | 600                 |           |           | 300      | 501.1          | 323.1   | 768.0   | Godavari delta (IND)                              |
| 2  |                     |           | 130       | 130      | 174.8          | 76.2    | 386.9   | Digha (IND)                                       |
| 3  |                     |           | 80        | 80       | 76.2           | 35.7    | 173.9   | Songkhla (THA)                                    |
| 4  |                     |           | 100       | 100      | 84.6           | 36.0    | 124.1   | Wadi Ham (UAE)                                    |
| 5  |                     |           | 50        | 50       | 72.9           | 41.2    | 120.0   | Carnavon (AUS)                                    |
| 6  | 600                 |           |           | 300      | 272.2          | 51.0    | 897.8   | Mekong (VNM)                                      |
| 7  | 100                 | 20        | 70        | 70       | 116.9          | 30.6    | 244.3   | Rabat (MAR)                                       |
| 8  | 500                 | 300       |           | 400      | 281.0          | 41.7    | 648.4   | South Jangtze coast, NE (CHN)                     |
| 9  | 600                 |           |           | 300      | 161.9          | 64.9    | 308.4   | Goksu plain (TUR)                                 |
| 10 | 20                  |           |           | 10       | 34.9           | 22.3    | 51.2    | Mar de Ajo (ARG)                                  |
| 11 |                     |           | 50        | 50       | 277.4          | 49.0    | 750.8   | Falster island (DKN)                              |
| 12 |                     |           | 50        | 50       | 215.6          | 2.1     | 5143.4  | Riga gulf (EST)                                   |
| 13 |                     |           | 200       | 200      | 238.5          | 53.5    | 615.2   | South Jangtze coast, SW (CHN)                     |
| 14 | 900                 |           |           | 450      | 484.8          | 33.5    | 1394.4  | Nile delta (EGY)                                  |
| 15 | 45                  |           | 25        | 25       | 210.1          | 83.8    | 333.9   | Thamirabarani delta (IND)                         |
| 16 | 100                 |           |           | 50       | 190.9          | 93.5    | 310.7   | Kuala Lumpur (MYS)                                |
| 17 | 150                 |           |           | 75       | 79.9           | 2.2     | 371.3   | Saloum delta (SEN)                                |
| 18 |                     | 1000      |           |          | 261.0          | 40.7    | 984.0   | Kilwa group (TZA)                                 |
| 19 | 250                 |           | 200       | 200      | 278.9          | 44.8    | 649.5   | Coastal aquifer (ISR)                             |
| 20 | 300                 |           | 250       | 250      | 268.8          | 41.5    | 483.1   | Bekasi (IDN)                                      |
| 21 | 420                 |           |           | 210      | 110.9          | 9.4     | 331.7   | Perth Basin (AUS)                                 |
| 22 | 1000                | 50        | 600       | 600      | 161.8          | 5.0     | 1091.9  | Great artesian basin (AUS)                        |
| 23 | 120                 |           |           | 60       | 106.8          | 1.1     | 496.4   | Canning Basin (AUS)                               |
| 24 | 1000                | 150       |           | 575      | 166.0          | 53.4    | 399.6   | Doñana National Park (ESP)                        |
| 25 | 180                 | 50        |           | 115      | 109.7          | 67.3    | 186.5   | Barcelona (ESP)                                   |
| 26 | 200                 | 80        |           | 140      | 119.0          | 39.8    | 163.9   | Perpignan (FRA)                                   |
| 27 | 218                 | 18        | 120       | 120      | 104.2          | 0.4     | 247.3   | Oristano (ITA)                                    |
| 28 | 300                 |           |           | 150      | 84.1           | 40.7    | 128.5   | Muravera (ITA)                                    |
| 29 | 100                 |           |           | 50       | 177.6          | 89.2    | 236.5   | Siracusa (ITA)                                    |
| 30 | 200                 |           |           | 100      | 150.8          | 81.1    | 201.2   | Grosseto (ITA)                                    |
| 31 |                     | 100       |           | 200      | 153.4          | 2.1     | 317.0   | Versilia (ITA)                                    |
| 32 | 150                 | 25        | 100       | 100      | 116.8          | 54.5    | 312.9   | Coastal aquifer (BEL)                             |
| 33 | 315                 | 30        | 90        | 90       | 185.2          | 62.1    | 436.4   | Northern dutch coast (NLD)                        |
| 34 | 600                 | 100       | 200       | 200      | 441.1          | 165.4   | 875.9   | Zeeland (NLD)                                     |
| 35 | 175                 | 125       |           | 150      | 66.3           | 16.6    | 261.9   | Wilhelmshaven (GER)                               |
| 36 | 200                 | 80        |           | 140      | 125.7          | 58.4    | 180.0   | Castellon de la Plana (ESP)                       |
| 37 |                     |           | 200       | 200      | 187.8          | 91.5    | 429.0   | Ebro delta (ESP)                                  |
| 38 |                     |           | 100       | 100      | 131.6          | 78.8    | 211.3   | Scanzano (ITA)                                    |
| 39 | 300                 |           |           | 150      | 123.7          | 13.5    | 331.6   | Eureka aquifer, CA (USA)                          |
| 40 | 300                 | 30        |           | 165      | 165.8          | 28.3    | 520.4   | Cape Cod (USA)                                    |
| 41 | 600                 | 170       |           | 385      | 260.8          | 1.4     | 1245.4  | Long Island (USA)                                 |
| 42 | 1200                |           |           | 600      | 285.0          | 33.7    | 815.5   | North Atlantic coastal plain, NJ (USA)            |
| 43 | 2400                |           |           | 1200     | 295.9          | 21.8    | 2028.6  | North Atlantic coastal plain, MA (USA)            |
| 44 | 3100                |           |           | 1550     | 444.8          | 6.4     | 4983.9  | North Atlantic coastal plain, NC (USA)            |
| 45 | 2000                | 300       |           | 1150     | 266.5          | 24.5    | 2652.5  | Coastal lowlands aq. system, TX (USA)             |
| 46 | 2400                | 1200      |           | 1800     | 83.9           | 72.9    | 94.8    | Coastal lowlands aq. system SE, LA (USA)          |
| 47 | 3600                | 1200      |           | 2400     | 367.7          | 120.6   | 1085.5  | Coastal lowlands aq. system NW, LA (USA)          |
| 48 | 1000                |           |           | 500      | 204.7          | 22.2    | 815.7   | Mississippi emayment aq. (USA)                    |
| 49 | 1000                |           |           | 500      | 130.8          | 2.2     | 496.7   | Puget-Willamette trough regional aq. system (USA) |
| 50 | 35                  | 15        |           | 25       | 97.4           | 16.2    | 388.0   | Washington coast N (USA)                          |
| 51 | 200                 | 35        |           | 117.5    | 138.7          | 14.1    | 318.1   | Washington coast S (USA)                          |
| 52 | 300                 |           |           | 150      | 75.7           | 3.7     | 182.3   | Santa Clara valley (USA)                          |
| 53 | 300                 |           |           | 150      | 162.9          | 92.7    | 204.2   | Salinas Valley (USA)                              |
| 54 | 1200                | 30        |           | 615      | 286.6          | 130.3   | 492.4   | Los Angeles - Orange county (USA)                 |
| 55 | 1000                | 200       |           | 600      | 170.2          | 7.0     | 1762.3  | FL - W and AL coast (USA)                         |
| 56 | 1050                | 850       |           | 950      | 95.5           | 1.9     | 1172.4  | FL - S (USA)                                      |
| 57 | 200                 | 60        |           | 130      | 210.7          | 30.0    | 1293.4  | SC - S (USA)                                      |
| 58 | 850                 | 200       |           | 525      | 167.0          | 52.0    | 723.7   | Georgia coast (USA)                               |
| 59 | 850                 | 700       |           | 775      | 189.5          | 6.1     | 2079.0  | FL - N (USA)                                      |
| 60 | 2000                |           |           | 1000     | 171.7          | 1.3     | 805.5   | Niger delta (NGA)                                 |
| 61 | 1200                |           |           | 600      | 415.4          | 46.3    | 929.4   | Po delta (ITA)                                    |
| 62 | 180                 | 30        |           | 105      | 247.3          | 4.7     | 490.5   | Jifarah Plain (LBY)                               |
| 63 |                     |           | 150       | 150      | 295.2          | 88.0    | 1049.5  | Dar es Salaam (TZA)                               |
| 64 | 450                 | 40        |           | 245      | 286.6          | 65.2    | 608.0   | Kirishna river delta (IND)                        |

**Table S4 Parameter values for the three cross-sections, the values are given for models with minimum and maximum estimated sediment thickness at the coastline. The total length of simulation for the test case in Virginia, USA is larger than for the other two test cases due to the complexity and size of the aquifer system. This was done to ensure that the steady-state (or near steady-state) is reached, for the changes of fresh groundwater cells in time see Figure S10 in the Supplementary information.**

|                                                        | Italy             |         | Israel   |        | Virginia, USA |        |
|--------------------------------------------------------|-------------------|---------|----------|--------|---------------|--------|
| Sediment thickness at coastline                        | 50m               | 500m    | 100m     | 1400m  | 200m          | 1500m  |
| Number of columns                                      | 1,060             | 1,588   | 385      | 494    | 547           | 578    |
| Number of layers                                       | 53                | 411     | 43       | 110    | 44            | 106    |
| Layer thickness (m)                                    | 3                 |         | 10       |        | 10            |        |
| Column width (m)                                       | 25                |         | 100      |        | 500           |        |
| Top elevation (m asl.)                                 | 26                |         | 95       |        | 59            |        |
| Bottom elevation (m asl.)                              | -62               | -1,002  | -335     | -1,005 | -381          | -1,001 |
| Length of simulation (years)                           | 10,000            |         |          |        | 100,000       |        |
| Number of time steps                                   | 2,500             |         |          |        | 10,000        |        |
| Total active cells                                     | 13,224            | 534,879 | 3,021    | 30,332 | 9,319         | 43,630 |
| Horizontal hydraulic conductivity aquifer (m/d)        | 10                |         |          |        |               |        |
| Vertical hydraulic conductivity aquifer (m/d)          | 1                 |         |          |        |               |        |
| Horizontal hydraulic conductivity aquitard (m/d)       | 1.00E-04          |         | 1.00E-04 |        | 1.00E-04      |        |
| Vertical hydraulic conductivity aquitard (m/d)         | 1.00E-07          |         | 1.00E-07 |        | 1.00E-07      |        |
| Layer type                                             | confined          |         |          |        |               |        |
| Total amount of GHB cells                              | 887               | 1415    | 200      | 321    | 274           | 431    |
| Recharge rate (m/d)                                    | 0.001             |         | 0.0005   |        |               |        |
| Head change criterion for convergence (m)              | 1.00E-04          |         |          |        |               |        |
| Residual criterion for convergence (m <sup>3</sup> /d) | 10                |         |          |        |               |        |
| Porosity                                               | 0.35              |         |          |        |               |        |
| Solver type                                            | Finite Difference |         |          |        |               |        |
| Longitudinal dispersivity                              | 1                 |         |          |        |               |        |
| Ratio horizontal transverse disp./ long. disp.         | 0.1               |         |          |        |               |        |
| Diffusion coefficient (m <sup>2</sup> /d)              | 8.64E-05          |         |          |        |               |        |

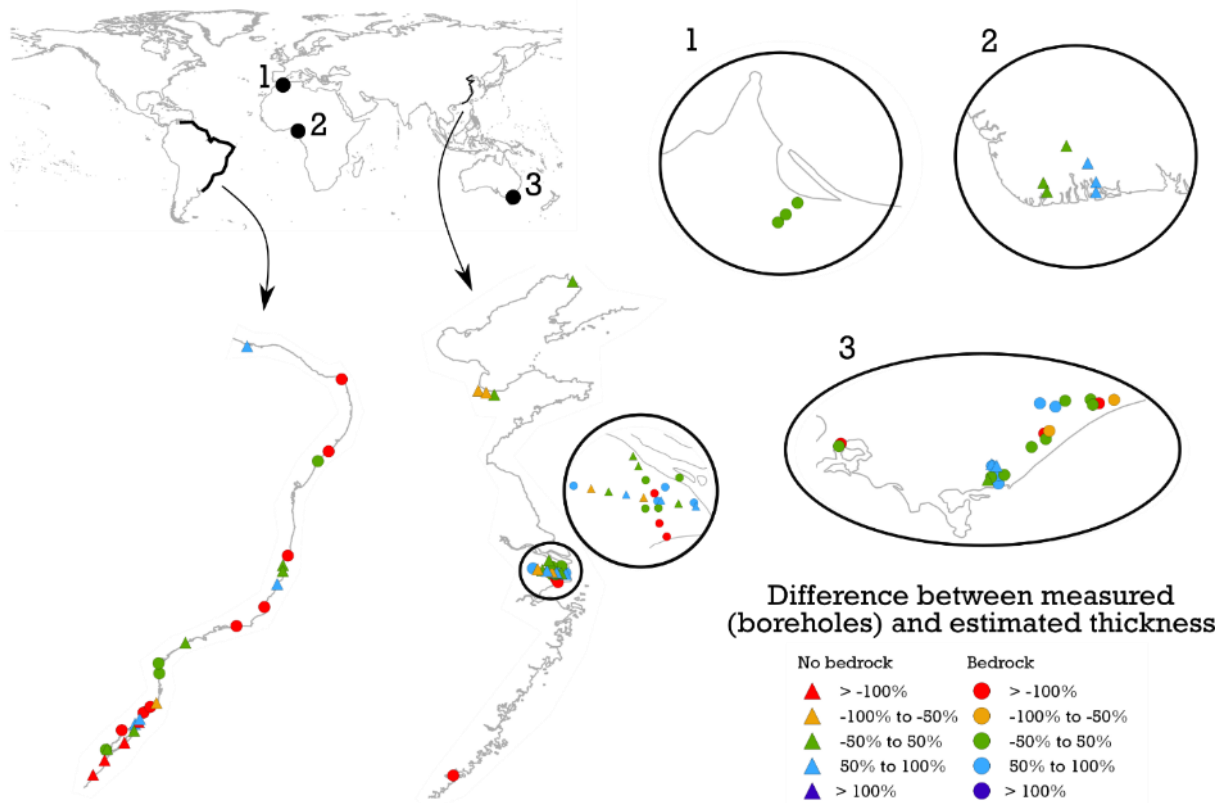

**Figure S1. Schematization of borehole validation using the difference between the measured sediment thickness and an average estimated thickness in a radius of 2.5km around the borehole location. The boreholes are divided into two groups depending on any bedrock formation indicated in the borehole report.**



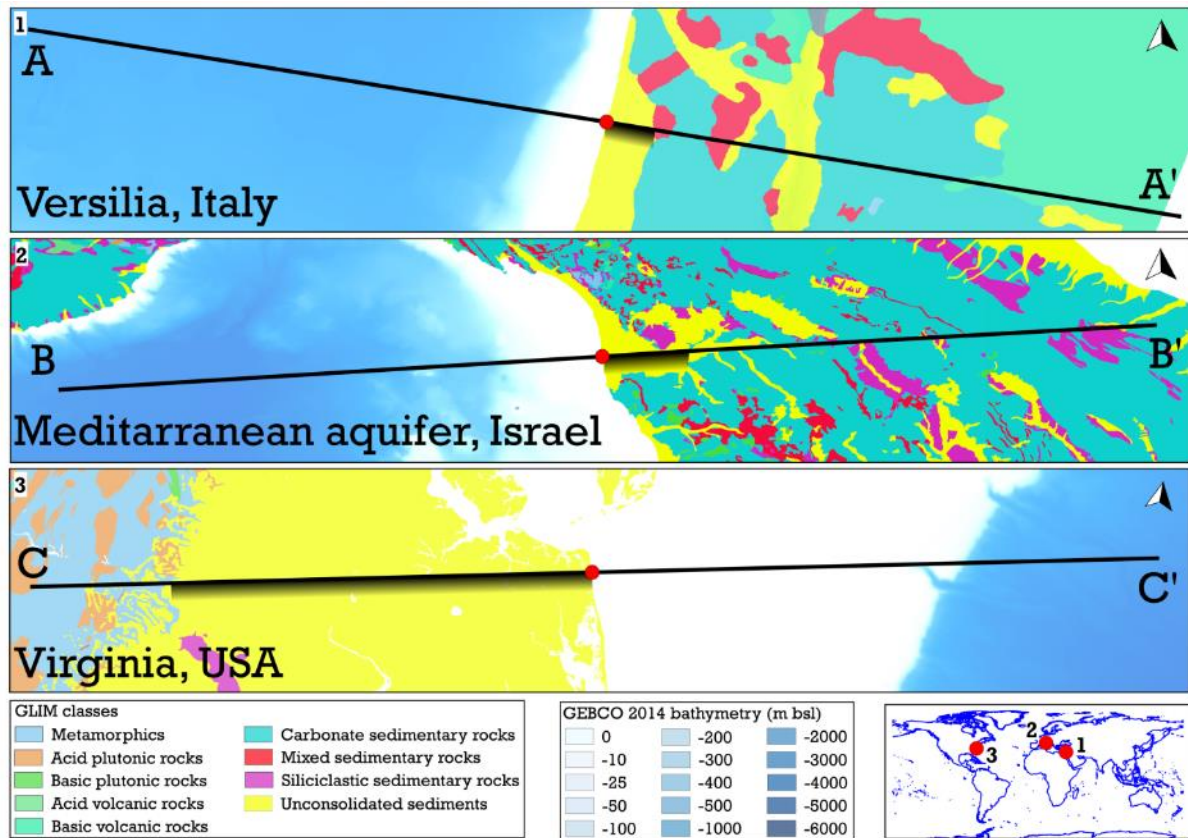

Figure S2. Location of the cross-sections used as examples to illustrate the ATE method. The black shadow represents the extent of the coastal plain in each cross-section while the whole black line indicates the span of the cross-section (in total 400km).

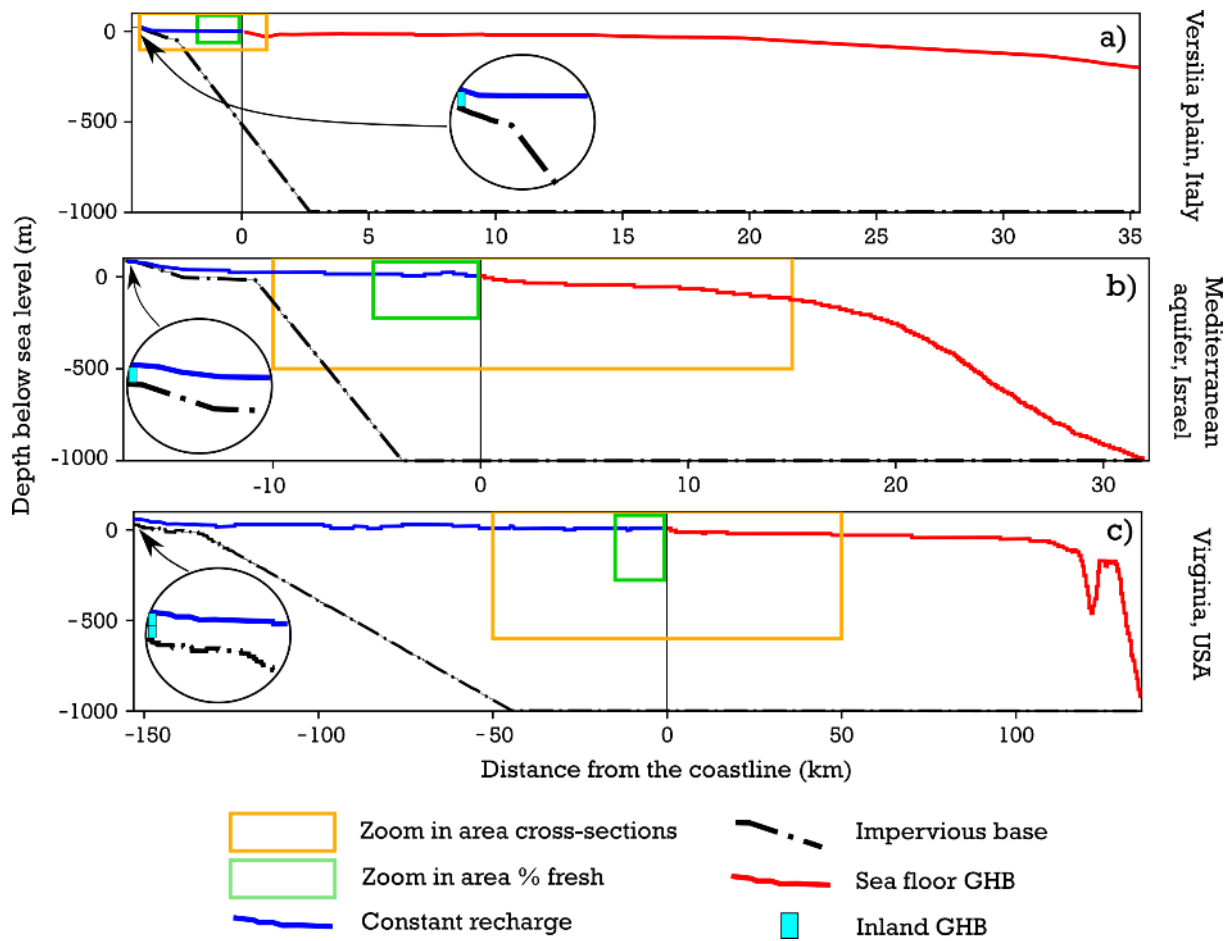

Figure S3. Model concept schematization for all three test cases. a) Versilia plain, Italy, b) Mediterranean aquifer, Israel and c) Virginia, USA. The zoom in area cross-section corresponds to the areas shown in Figures S8-S10 and Figure 4 in the main article.

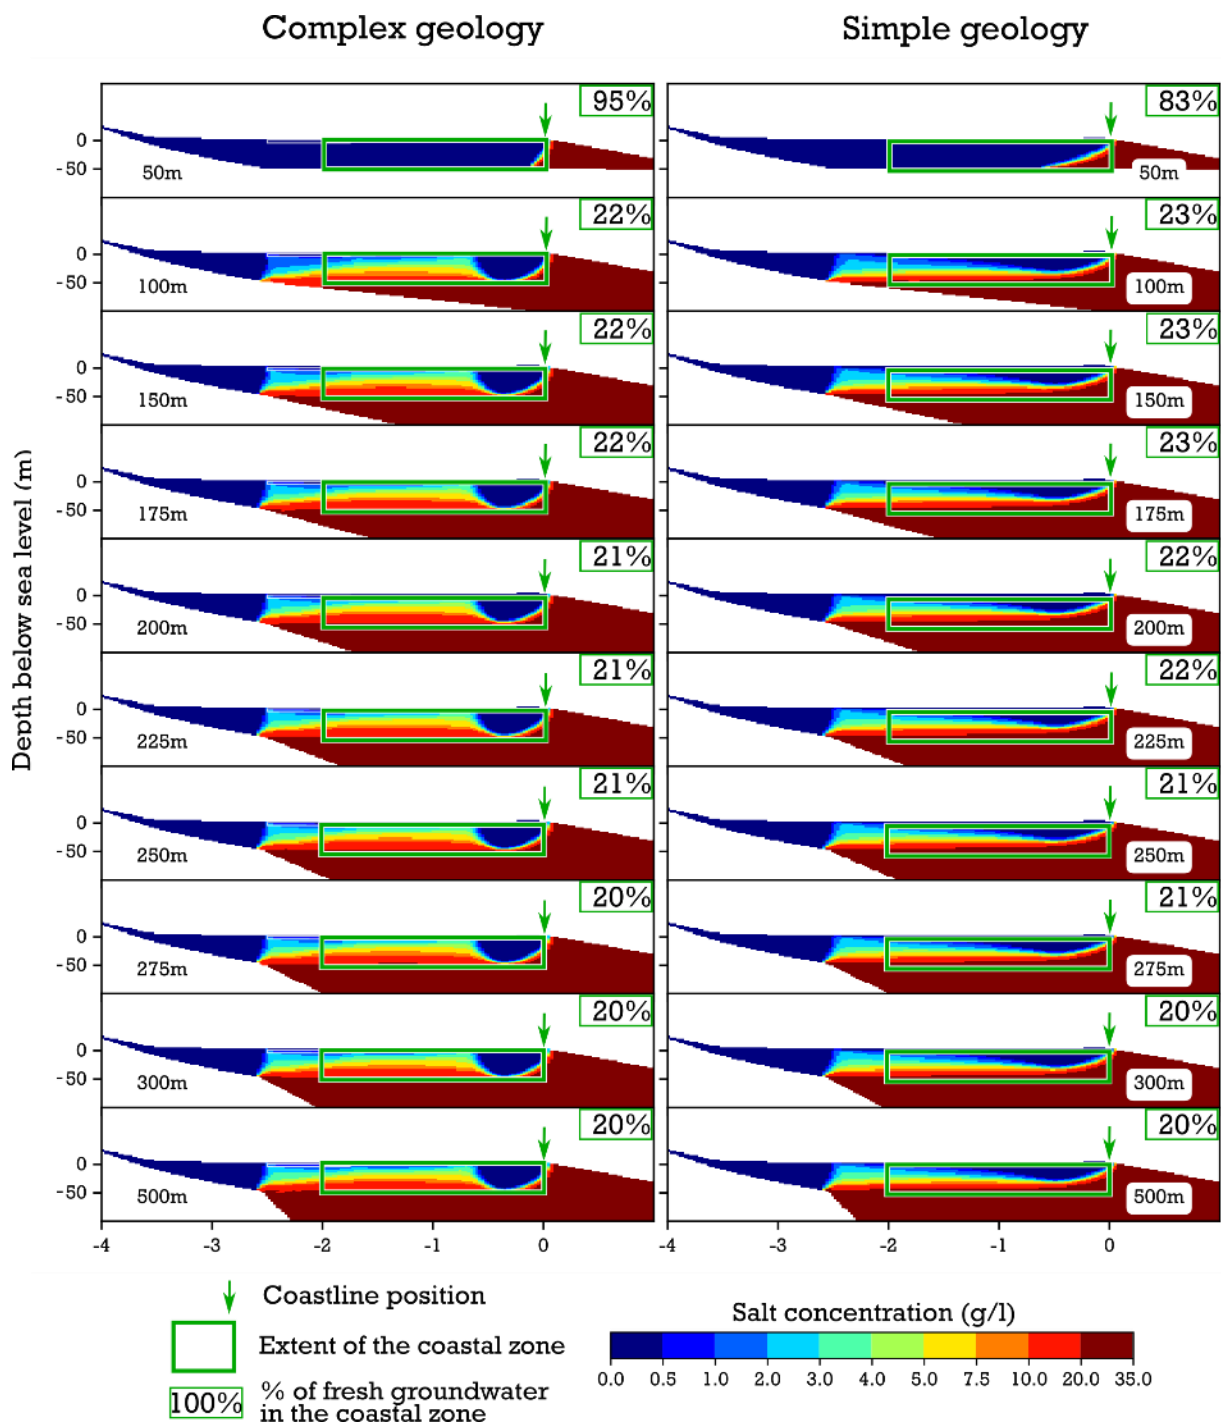

Figure S4. Simulation results for the cross-section located in Versilia plain, Italy. Salt concentration profiles are given for various sediment thicknesses at the coastline and two different geological scenarios (homogeneous and heterogeneous based on information provided by literature).

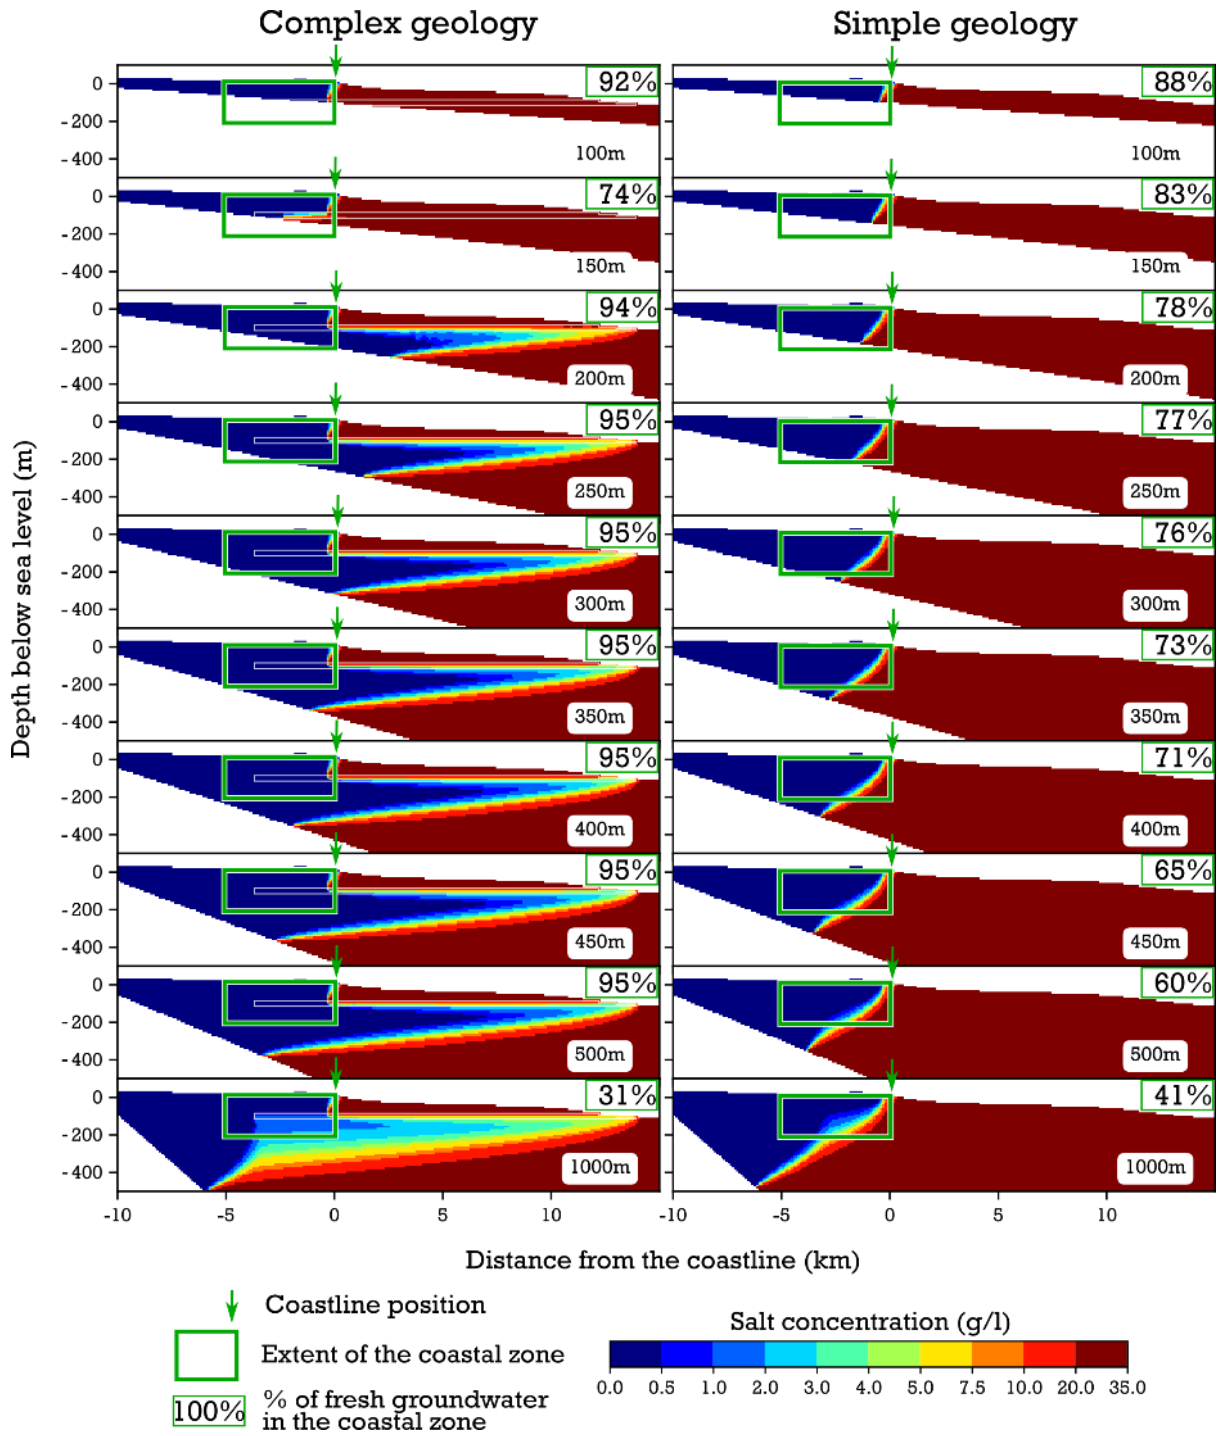

Figure S5. Simulation results for the cross-section located in the Mediterranean coastal plain aquifer, Israel. Salt concentration profiles are given for various sediment thicknesses at the coastline and two different geological scenarios (homogeneous and heterogeneous based on information provided by literature).

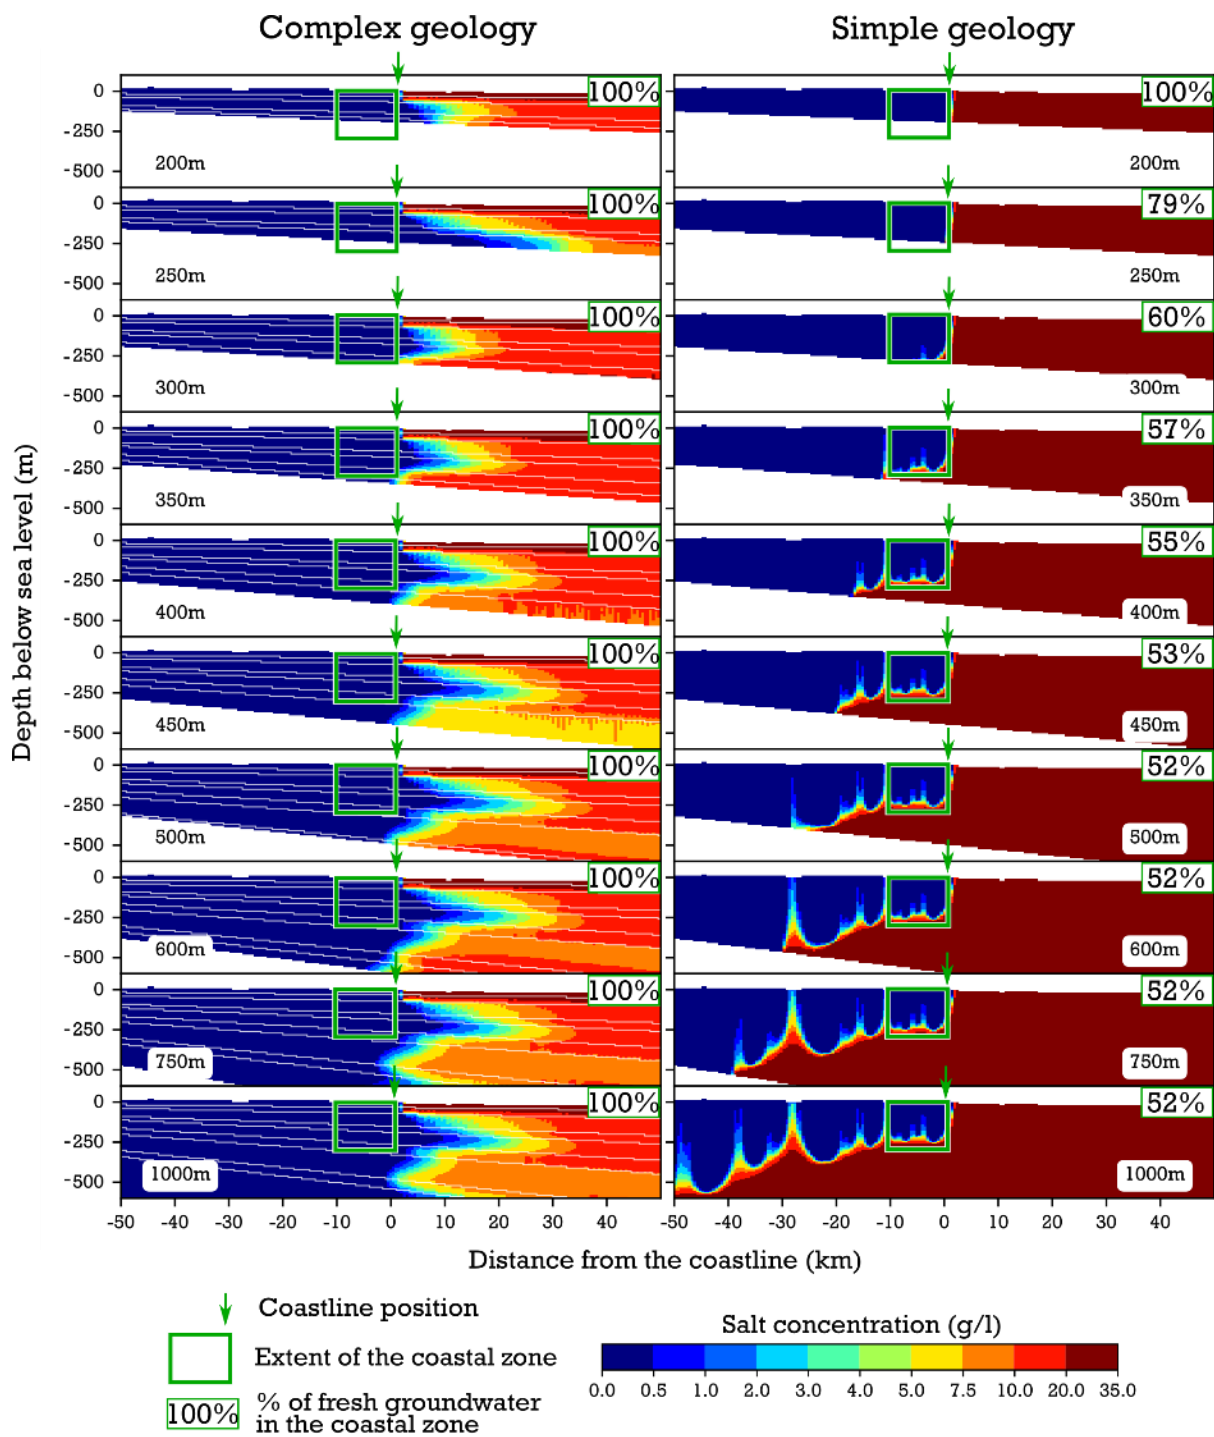

Figure S6. Simulation results for the cross-section located in North Atlantic Coastal Plain, Virginia, USA. Salt concentration profiles are given for various sediment thicknesses at the coastline and two different geological scenarios (homogeneous and heterogeneous based on information provided by literature).
